# Supplementary material
Source: PubMed Central journal article supplement (PMC6324941)
Supplement: NIHMS1512628-supplement-125_2018_4764_MOESM1_ESM.pdf [file NIHMS1512628-supplement-125_2018_4764_MOESM1_ESM.pdf]

### The role of coronary artery calcification testing in incident coronary artery disease risk prediction in type 1 diabetes

ESM Table 1. Baseline clinical characteristics of participants between those with and without repeated CAC measures

| Characteristics<br>(N=292)   | Had repeated CAC measures |                 |
|------------------------------|---------------------------|-----------------|
|                              | No<br>(n=93)              | Yes<br>(n=199)  |
| Age, years                   | 40.5 (7.5)                | 36.5 (7.1)**    |
| Diabetes duration, years     | 33.0 (7.7)                | 27.9 (6.8)**    |
| Age at diabetes onset, years | 7.5 (4.1)                 | 8.7 (4.1)*      |
| Female, % (n)                | 45.2 (42)                 | 53.3 (106)      |
| Ever smoker, % (n)           | 41.9 (39)                 | 35.2 (70)       |
| High WHR, % (n) <sup>a</sup> |                           |                 |
| Male sex                     | 19.6 (10)                 | 7.5 (7)         |
| Female sex                   | 31.0 (13)                 | 21.7 (23)       |
| BMI, kg/m <sup>2</sup>       | 26.8 (4.3)                | 25.2 (3.6)**    |
| Pulse rate, beats/min        | 118.7 (15.6)              | 114.1 (15.2)*   |
| Systolic BP, mmHg            | 69.7 (10.9)               | 69.7 (10.2)     |
| Diastolic BP, mmHg           | 28.0 (26)                 | 21.1 (42)       |
| Hypertension, % (n)          | 66 (8.2%)                 | 67 (8.3%)       |
| AER, µg/min <sup>b</sup>     | 11.4 (5.6, 64.0)          | 10.5 (5.3,44.5) |
| HDL-cholesterol, mmol/l      |                           |                 |
| Male sex                     | 1.3 (0.3)                 | 1.2 (0.3)       |
| Female sex                   | 1.7 (0.5)                 | 1.6 (0.4)       |
| Non-HDL-cholesterol, mmol/l  | 3.4 (1.0)                 | 3.5 (0.9)       |
| Statin use, % (n)            | 24.7 (23)                 | 2.0 (4)**       |
| Baseline CAC score           |                           |                 |
| Agatston <sup>b</sup>        | 6.6 (0, 116.2)            | 0 (0, 28.1)**   |
| Volume <sup>b</sup>          | 6.7 (0, 143.2)            | 0 (0, 32.9)**   |
| Density                      | 1.7 (2.0)                 | 1.1 (1.4)**     |

Categorical variables are presented as percentage (number) and continuous variables as mean (SD) or median (first and third quartiles)

<sup>a</sup>High WHR was defined as >1.0 for men or >0.85 for women

<sup>b</sup>Log<sub>e</sub> transformed before statistical testing

\* $p < 0.05$  and \*\* $p < 0.01$  for the comparison between those with and without repeated CAC measures

WHR, waist–hip ratio

ESM Table 2. Associations between annual CAC progression (in quantiles) and incident CAD events (including cases occurred between the two CAC scans)

| CAC measures<br>(n=199, events=55 [18 out of the<br>55 events occurred between the<br>two CAC scans]) |         | Unadjusted      |         | Adjusted <sup>a</sup> |         |
|-------------------------------------------------------------------------------------------------------|---------|-----------------|---------|-----------------------|---------|
|                                                                                                       |         | HR (95%CI)      | p value | HR (95%CI)            | p value |
| Volume                                                                                                |         |                 |         |                       |         |
| Progression <sup>b</sup>                                                                              | Q1      | ref             |         | ref                   |         |
|                                                                                                       | Q2      | 1.7 (0.5, 6.1)  | 0.421   | 1.9 (0.5, 7.1)        | 0.327   |
|                                                                                                       | Q3      | 4.0 (1.3, 11.8) | 0.013   | 4.0 (1.2, 13.3)       | 0.024   |
|                                                                                                       | Q4      | 5.5 (1.8, 17.0) | 0.003   | 5.1 (1.4, 18.7)       | 0.013   |
| Baseline                                                                                              | 0       | ref             |         | ref                   |         |
|                                                                                                       | 1-99    | 2.0 (0.9, 4.2)  | 0.078   | 1.9 (0.8, 4.4)        | 0.141   |
|                                                                                                       | 100-399 | 1.9 (0.8, 4.7)  | 0.168   | 1.6 (0.6, 4.7)        | 0.360   |
|                                                                                                       | ≥ 400   | 6.2 (2.3, 16.6) | <0.001  | 5.5 (1.7, 17.9)       | 0.004   |
| Agatston score                                                                                        |         |                 |         |                       |         |
| Progression <sup>b</sup>                                                                              | Q1      | ref             |         | ref                   |         |
|                                                                                                       | Q2      | 1.3 (0.3, 5.4)  | 0.750   | 1.4 (0.3, 6.0)        | 0.674   |
|                                                                                                       | Q3      | 3.5 (1.1, 10.9) | 0.028   | 4.0 (1.2, 14.0)       | 0.029   |
|                                                                                                       | Q4      | 6.1 (1.9, 19.7) | 0.003   | 4.8 (1.3, 17.6)       | 0.019   |
| Baseline                                                                                              | 0       | ref             |         | Ref                   |         |
|                                                                                                       | 1-99    | 1.7 (0.8, 3.8)  | 0.188   | 1.6 (0.7, 3.9)        | 0.300   |
|                                                                                                       | 100-399 | 1.5 (0.6, 4.0)  | 0.452   | 1.4 (0.5, 4.4)        | 0.525   |
|                                                                                                       | ≥ 400   | 4.1 (1.5, 11.7) | 0.006   | 4.1 (1.3, 12.8)       | 0.014   |

Baseline and progression of CAC were included in the same model

<sup>a</sup>Adjusted for sex, diabetes duration, ever smoking, BMI, HbA1c, cholesterol (HDL and non-HDL), urinary AER, hypertension and the use of statins

<sup>b</sup>CAC progression was defined as the annualised difference in square root between baseline and follow-up CAC measures

ESM Table 3. Likelihood ratio tests for model fit evaluation

| Subjects                                     | Model <sup>a</sup>                            | -2Log Likelihood | <i>p</i> value                                         |
|----------------------------------------------|-----------------------------------------------|------------------|--------------------------------------------------------|
| Total<br>(n=292)                             | Base                                          | 692.542          | –                                                      |
|                                              | Base+ baseline Agatston                       | 677.988          | <0.001 (vs Base)                                       |
|                                              | Base+ baseline volume                         | 675.307          | <0.001 (vs Base)                                       |
| In those<br>baseline<br>CAC>0<br>(n=144)     | Base                                          | 470.385          | –                                                      |
|                                              | Base+ baseline volume                         | 466.666          | 0.054 (vs Base)                                        |
|                                              | Base+ baseline volume+density                 | 460.050          | 0.006 (vs Base)<br>0.010 (vs Base+ volume)             |
| In those<br>with two<br>CAC scans<br>(n=181) | Base                                          | 292.420          | –                                                      |
|                                              | Base+ baseline Agatston                       | 288.975          | 0.063 (vs Base)                                        |
|                                              | Base+ baseline and progression<br>in Agatston | 285.800          | 0.010 (vs Base)<br>0.074 (vs Base + baseline Agatston) |
|                                              | Base+ baseline volume                         | 288.216          | 0.040 (vs Base)                                        |
|                                              | Base+ baseline and progression<br>in volume   | 284.120          | 0.004 (vs Base)<br>0.043 (vs Base+ baseline volume)    |

<sup>a</sup>Base model was adjusted for sex, diabetes duration, ever smoking, BMI, HbA<sub>1c</sub>, cholesterol (HDL and non-HDL), urinary AER, hypertension and the use of statins.

ESM Table 4. C-statistics for Cox model comparison

| Participants                              | Model <sup>a</sup>                            | CAD<br>C statistic (SE) | <i>p</i> value                                                |
|-------------------------------------------|-----------------------------------------------|-------------------------|---------------------------------------------------------------|
| Total<br>(n=292)                          | Base                                          | 0.795 (0.047)           | –                                                             |
|                                           | Base+ baseline Agatston                       | 0.847 (0.041)           | 0.045 (vs Base)                                               |
|                                           | Base+ baseline volume                         | 0.848 (0.041)           | 0.037 (vs Base)                                               |
| In those with<br>two CAC scans<br>(n=181) | Base                                          | 0.764 (0.129)           | –                                                             |
|                                           | Base+ baseline Agatston                       | 0.822 (0.115)           | 0.363 (vs Base)                                               |
|                                           | Base+ baseline and progression<br>in Agatston | 0.829 (0.106)           | 0.352 (vs Base)<br><br>0.783 (vs Base +<br>baseline Agatston) |
|                                           | Base+ baseline CAC volume                     | 0.820 (0.114)           | 0.388 (vs Base)                                               |
|                                           | Base+ baseline and progression<br>in volume   | 0.827 (0.106)           | 0.329 (vs Base)<br><br>0.571 (vs Base+<br>baseline volume)    |

<sup>a</sup>Base model was adjusted for sex, diabetes duration, ever smoking, BMI, HbA<sub>1c</sub>, cholesterol (HDL and non-HDL), urinary AER, hypertension and the use of statins.

SE: standard error

ESM Table 5. Continuous net reclassification improvement (NRI) for Cox model comparison

| Participants                        | Model <sup>a</sup>                                                     | CAD NRI (95% CI)         | <i>p</i> value |
|-------------------------------------|------------------------------------------------------------------------|--------------------------|----------------|
| Total (n=292)                       | Base+ baseline Agatston vs Base                                        | 0.283<br>(0.001, 0.513)  | 0.048          |
|                                     | Base+ baseline volume vs Base                                          | 0.315<br>(0.038, 0.530)  | 0.028          |
| In those with two CAC scans (n=181) | Base+ baseline Agatston vs Base                                        | 0.202<br>(-0.158, 0.553) | 0.209          |
|                                     | Base+ baseline and progression in Agatston vs Base                     | 0.380<br>(-0.159, 0.639) | 0.189          |
|                                     | Base+ baseline and progression in Agatston vs Base + baseline Agatston | 0.281<br>(-0.553, 0.591) | 0.458          |
| In those with two CAC scans (n=181) | Base+ baseline volume vs Base                                          | 0.226<br>(-0.199, 0.539) | 0.299          |
|                                     | Base+ baseline and progression in volume vs Base                       | 0.255<br>(-0.131, 0.584) | 0.159          |
|                                     | Base+ baseline and progression in volume vs Base + baseline volume     | 0.091<br>(-0.434, 0.455) | 0.697          |

<sup>a</sup>Base model was adjusted for sex, diabetes duration, ever smoking, BMI, HbA1c, cholesterol (HDL and non-HDL), urinary AER, hypertension and the use of statins.
